# Supplementary material
Source: PubMed Central journal article supplement (PMC4379131)
Supplement: NIHMS635344-supplement-1.pdf [file NIHMS635344-supplement-1.pdf]

**Supplementary Table S1a. Childhood APL Gender Ratios from AML Studies**

| Region                                | Study (Year)                        | Age<br>(yrs) | Period of Data Collection | APL<br>(n) | Gender Ratio<br>(M/F) | Methods for APL Classification |            |
|---------------------------------------|-------------------------------------|--------------|---------------------------|------------|-----------------------|--------------------------------|------------|
|                                       |                                     |              |                           |            |                       | Cytogenetics                   | Morphology |
| <b>North America</b>                  |                                     |              |                           |            |                       |                                |            |
| United States                         | Brodeur et. al (1983) [54]          | ≤ 19         | Jul 1978 - Dec 1981       | 5          | 1/3 <sup>a</sup>      | t(15;17)                       | M3         |
| United States                         | Kaneko et. al (1982) [50]           | ≤ 16         | Jun 1977 - Jun 1981       | 3          | 3/0                   | t(15;17)                       | M3         |
| United States                         | Martinez-Climent et. al (1995) [48] | < 20         | Jul 1981 - Dec 1993       | 12         | 3/9                   | t(15;17)                       | M3         |
| Mexico City                           | Mejia-Arangure et. al (2005) [59]   | 0-14         | 1996 - 2000               | 9          | 0/9                   |                                | M3         |
| <b>South &amp; Central America</b>    |                                     |              |                           |            |                       |                                |            |
| Nicaragua                             | Malta Corea et. al (1993) [66]      | 6 - 15.5     | 1990 - 1992               | 10         | 5/5                   |                                | M3         |
| Argentina                             | Acevedo et. al (1994) [24]          | 0 - 15       | 1990 - 1992               | 1          | 0/1                   | t(15;17)                       | M3         |
| Venezuela                             | De Salvo et. al (1989) [67]         | < 10         | 1982 - 1987               | 5          | 2/3                   |                                | M3         |
| <b>Europe</b>                         |                                     |              |                           |            |                       |                                |            |
| Italy                                 | Biondi et. al (1994) [83]           | ≤ 15         | 1989 - 1993               | 54         | 28/26                 | t(15;17)                       | M3         |
| Germany                               | Creutzig et. al (1985) [76]         | < 17         | Dec 1978 - Oct 1982       | 6          | 4/2                   |                                | M3         |
| Netherlands                           | Slater et. al (1983) [90]           | 0.08 - 15.25 | N/A                       | 1          | 1/0                   | t(15;17)                       | M3         |
| Yugoslavia <sup>b</sup>               | Petkovic et. al (1992) [175]        | 0.5 - 15     | N/A                       | 1          | 1/0                   | t(15;17)                       | M3         |
| <b>Africa</b>                         |                                     |              |                           |            |                       |                                |            |
| Eastern Cape, Cape Town, South Africa | Gilbert et. al (1987) [182]         | 0.67 - 10.9  | Jan 1981 - Dec 1985       | 9          | 3/6                   | t(15;17)                       | M3         |
| Johannesburg, South Africa            | Bernstein et. al (1984) [30]        | ≤ 15         | Jan 1978 - Apr 1982       | 5          | 3/2                   | t(15;17)                       | M3         |
| Ibadan, Nigeria                       | Williams et. al (1982) [110]        | ≤ 14         | Jul 1978 - Dec 1981       | 2          | 1/1                   |                                | M3         |
| <b>Asia</b>                           |                                     |              |                           |            |                       |                                |            |
| China (Taiwan)                        | Yeh et. al (2007) [135]             | < 15         | Nov 1995 - Jul 2004       | 6          | 5/1                   | t(15;17)                       | M3         |

<sup>a</sup> gender not given for one patient with normal karyotype.<sup>b</sup> present day Serbia, Montenegro, Bosnia and Herzegovina, Croatia, Macedonia, and Slovenia.
