# Supplementary material
Source: PubMed Central journal article supplement (PMC4379131)
Supplement: NIHMS635344-supplement-2.pdf [file NIHMS635344-supplement-2.pdf]

**Supplementary Table S1b. Childhood APL Gender Ratios from APL Only Studies**

| Region                       | Study (Year)                        | Age (yrs)   | Period of Data Collection | APL (n)         | Gender Ratio (M/F) | Methods for APL Classification |            |          |
|------------------------------|-------------------------------------|-------------|---------------------------|-----------------|--------------------|--------------------------------|------------|----------|
|                              |                                     |             |                           |                 |                    | Cytogenetics                   | Morphology | PCR      |
| <b>North America</b>         |                                     |             |                           |                 |                    |                                |            |          |
| United States                | Dvorak et. al (2008) [189]          | 1 - 18      | May 1992 - Mar 2005       | 32              | 14/18              | t(15;17)                       | M3         | PML-RARA |
| United States                | Kutny et. al (2012) [195]           | < 21        | N/A                       | 95              | 50/45              | t(15;17)                       | M3         | PML-RARA |
| United States                | Bourquin et. al (2004) [186]        | 2 - 21      | 1986 - 2003               | 11              | 3/8                | t(15;17)                       | M3         |          |
| <b>Asia</b>                  |                                     |             |                           |                 |                    |                                |            |          |
| India                        | George et. al (2004) [190]          | 6 - 14      | Dec 1998 - Oct 2003       | 11              | 5/6                | t(15;17)                       | M3         | PML-RARA |
| India                        | Bapna et. al (1998) [184]           | 3.5 - 15    | Feb 1992 - Dec 1996       | 15              | 12/3               | t(15;17)                       |            |          |
| Tianjin, China               | Zhang et. al (2011) [205]           | ≤ 14        | Jan 1999 - Dec 2003       | 37              | 19/18              | t(15;17)                       | M3         | PML-RARA |
| Tianjin, China               | Zhang et. al (2012) [200]           | < 16        | Jan 2004 - Feb 2010       | 40              | 33/7               | t(15;17)                       |            | PML-RARA |
| Tianjin, China               | Zhang et. al (2008) [201]           | < 18        | Jan 1999 - Dec 2005       | 65              | 36/29              | t(15;17)                       | M3         | PML-RARA |
| Gunagzhou, China             | Luo et. al (2009) [197]             | 0.42 - 15   | Dec 1999 - Jan 2008       | 30              | 20/10              |                                | M3         | PML-RARA |
| Liaoning, China              | Wang et. al (2010) [199]            | 4 - 16      | Jan 2000 - Jan 2009       | 35              | 22/13              | t(15;17)                       | M3         | PML-RARA |
| Harbin, China                | Zhou et. al (2010) [202]            | < 16        | Aug 2002 - Jan 2007       | 19              | 11/8               | t(15;17)                       | M3         | PML-RARA |
| China (Hong Kong)            | Au et. al (2011) [183]              | 2.8 - 15.9  | 1997 - 2010               | 30              | 16/14              | t(15;17)                       | M3         | PML-RARA |
| South Korea                  | Kim et. al (2010) [194]             | 2 - 14      | May 1999 - Dec 2007       | 23              | 11/12              | t(15;17)                       | M3         | PML-RARA |
| Japan                        | Hirota et. al (1997) [193]          | N/A         | N/A                       | 17 <sup>a</sup> | 10/7               | t(15;17)                       |            | PML-RARA |
| <b>South/Central America</b> |                                     |             |                           |                 |                    |                                |            |          |
| Culiacan, Mexico             | Ribeiro and Rego (2006) [29]        | 11.1 - 16.0 | 1989 - 2004               | 10              | 7/3                |                                | M3         |          |
| Guatemala City, Guatemala    | Ribeiro and Rego (2006) [29]        | 2.0 - 16.0  | 2000 - 2005               | 16              | 8/8                |                                | M3         |          |
| Managua, Nicaragua           | Ribeiro and Rego (2006) [29]        | 2.7 - 16.4  | 1995 - 2004               | 36              | 16/16              |                                | M3         |          |
| Recife, Brazil               | Ribeiro and Rego (2006) [29]        | 0.1 - 16.2  | 1997 - 2004               | 21              | 13/8               |                                | M3         |          |
| San Jose, Costa Rica         | Ribeiro and Rego (2006) [29]        | 1.7 - 11.9  | 1996 - 2005               | 12              | 4/8                |                                | M3         |          |
| San Salvador, El Salvador    | Ribeiro and Rego (2006) [29]        | 0.8 - 17.7  | 1998 - 2004               | 14              | 10/4               |                                | M3         |          |
| Tegucigalpa, Honduras        | Ribeiro and Rego (2006) [29]        | 2.6 - 16.1  | 1998 - 2004               | 12              | 7/5                |                                | M3         |          |
| Brazil                       | da Costa Moraes et. al (2008) [187] | 0 - 17      | Nov 2002 - Nov 2006       | 15              | 10/5               |                                | M3         |          |
| <b>Africa</b>                |                                     |             |                           |                 |                    |                                |            |          |
| Tunisia                      | Jeddi et. al (2011) [204]           | 4 - 19      | N/A                       | 20              | 9/11               | t(15;17)                       | M3         | PML-RARA |
| <b>Europe</b>                |                                     |             |                           |                 |                    |                                |            |          |
| Europe                       | de Botton et. al (2004) [188]       | < 18        | Apr 1993 - Oct 1998       | 31              | 9/22               | t(15;17)                       | M3         | PML-RARA |
| Germany                      | Lanvers et. al (2003) [196]         | 0.9 - 18.4  | 1994 - 1999               | 14              | 8/6                | t(15;17)                       | M3         |          |
| Italy                        | Testi et. al (2005) [198]           | 1.4 - 17.9  | Jan 1993 - Jun 2000       | 110             | 55/55              | t(15;17)                       |            | PML-RARA |
| Italy                        | Biondi et. al (1991) [185]          | 5 - 14      | N/A                       | 9 <sup>b</sup>  | 4/5                | t(15;17)                       | M3         |          |
| Italy                        | Guglielmi et. al (1998) [191]       | < 15        | Jan 1989 - Apr 1997       | 63              | 33/30              |                                | M3         | PML-RARA |
| Surrey, United Kingdom       | Hiorns et. al (1997) [192]          | 0 - 18      | 1979 - 1996               | 12 <sup>b</sup> | 8/4                |                                | M3         |          |
| <b>Multinational</b>         | Raimondi et. al (1999) [203]        | 0 - 20      | Jun 1988 - Mar 1993       | 55              | 32/23              | t(15;17)                       |            |          |

<sup>a</sup> data taken from translated paper abstract

<sup>b</sup> data for children taken from a larger study group including both adults and children
