# Supplementary material
Source: PubMed Central journal article supplement (PMC4379131)
Supplement: NIHMS635344-supplement-3.pdf [file NIHMS635344-supplement-3.pdf]

**Supplementary Table S2. Therapy-Related Childhood APL Case Studies**

| A) Therapy-Related APL Cases Diagnosed by Cytogenetics   |     |                              |                                                         |                  |                                                                                                                      |     |                                                  |                 |                                                                 |
|----------------------------------------------------------|-----|------------------------------|---------------------------------------------------------|------------------|----------------------------------------------------------------------------------------------------------------------|-----|--------------------------------------------------|-----------------|-----------------------------------------------------------------|
| Primary Tumor/Disease                                    | Sex | Age at t-APL diagnosis (yrs) | Treatment for Primary Disease                           | Latency (mo)     | Karyotype/Diagnostic Method                                                                                          | FAB | Treatment for APL                                | Outcome         | Reference                                                       |
| Acute lymphoblastic leukemia                             | M   | 10                           | RT, VP-16, Cy, VM-26                                    | 72               | 46,XY,t(11;17)(q32;q21)                                                                                              | M2  | N/A                                              | CR, 8 months    | Pui et. al (1989,1991) [206, 207]                               |
| Brain astrocytoma                                        | M   | 12                           | RT                                                      | 26               | 46,XX,t(15;17)                                                                                                       | M3  | DNR, ARA-C                                       | CR, 6+ months   | Beaumont et. al (2003) [208]<br>Detournignies et al (1992) [36] |
| Germ cell tumor (choriocarcinoma)                        | M   | 15                           | Epipodophyllotoxin                                      | 21.6             | 47,XXYc,t(15;17)(q22;q21)                                                                                            | M3  | N/A                                              | N/A             | Smith et. al (1999) [209]                                       |
| Glioblastoma                                             | M   | 20                           | RT (40 Gy)                                              | 31               | t(15;17)                                                                                                             | N/A | N/A                                              | Died            | Attili et. al (2006) [210]                                      |
| Familial hemophagocytic lymphohistiocytosis              | F   | 2                            | VP-16                                                   | 24               | t(15;17)                                                                                                             | M3  | N/A                                              | CR, 4+ months   | Rudd et. al (2006) [211]                                        |
| EBV-associated hemophagocytic lymphohistiocytosis        | M   | 3                            | VP-16, dexamethasone, cyclosporine, intrathecal MTX     | 18               | t(15;17)(q22;q12)                                                                                                    | N/A | ATRA, DNR, Ara-C                                 | CR              | Sathiyamoorthy et. al (2011) [212]                              |
| Hodgkin Lymphoma                                         | F   | 18                           | ABVD, mantle field RT (36 Gy), paraaortic field (30 Gy) | 23               | t(15;17)                                                                                                             | M3  | ATRA, Dox                                        | CR              | Elezovic et. al (2000) [213]                                    |
| Hodgkin Lymphoma                                         | F   | 19                           | ABVD, RT                                                | 33 <sup>a</sup>  | PML-RARA by RT-PCR                                                                                                   | N/A | N/A                                              | N/A             | Hasan et. al (2010) [214]                                       |
| Hodgkin Lymphoma CS IIIB                                 | F   | 19                           | ABVD, RT                                                | 23               | 46, XX,t(15;17)(q22;q11-21)                                                                                          | M3  | N/A                                              | N/A             | Antonijevic et. al (2011) [215]                                 |
| Hodgkin Lymphoma                                         | F   | 19                           | ABVD, RT                                                | 33               | PML-RARA by RT-PCR                                                                                                   | N/A | N/A                                              | N/A             | Ottone et. al (2012) [216]                                      |
| T-cell Non-Hodgkin Lymphoma                              | M   | 20                           | ACVBP, high dose MTX, VP-16, Ara-C, IFM                 | N/A              | 46,XX,t(15;17)                                                                                                       | N/A | ATRA, DNR, Ara-C                                 | CR, 83+ months  | Beaumont et. al (2003) [208]                                    |
| Non-Hodgkin Lymphoma                                     | M   | 10                           | VP-16                                                   | 30               | 46 XY t(11q-; 17q+)                                                                                                  | M5  | N/A                                              | N/A             | Sugita et. al (1993) [217]                                      |
| Non-Hodgkin Lymphoma                                     | F   | 8                            | Dox, Cy, VCR, MTX, L-asparaginase, 6-mercaptopurine     | 37               | 46,XX,inv(1)(p11;q12),t(15;17)(q22;q21), add(17)p13                                                                  | M3  | Pirarubicin, Ara-C, ATRA, BMT, MTX               | CR              | Ogami et. al (2004) [228]                                       |
| Langerhans cell histiocytosis                            | F   | 6                            | VBL, PSL, MTX, VP-16                                    | 23               | 46,XX,t(15;17)(q22;q21)                                                                                              | M3  | VP-16, Ara-C, MX                                 | CR              | Horibe et. al (1993) [222]                                      |
| Langerhans cell histiocytosis                            | F   | 3                            | VCR, MTX, PSL, Cy, VP-16                                | 36               | 46,XX,t(15;17)(q22;q12)                                                                                              | M3  | BFM-83 Protocol                                  | Died, 13 months | Horibe et. al (1993) [222]                                      |
| Langerhans cell histiocytosis                            | F   | 7                            | VP-16, PSL                                              | 56               | 46,XX,11p-,14q+,t(15;17)                                                                                             | M3  | DNR, Ara-C, VCR, 6-mercaptopurine, MX            | CR, 5+ months   | Matsuzaki et. al (1994) [227]                                   |
| Langerhans cell histiocytosis                            | M   | 5                            | VP-16, PDN                                              | 40               | 46 XY t(15;17)                                                                                                       | M3  | N/A                                              | N/A             | Haupt et. al (1997) [221]                                       |
| Langerhans cell histiocytosis                            | F   | 7.4                          | VBL, PDN, VP-16                                         | 61.2             | 46,XX,t(15;17)                                                                                                       | M3v | N/A                                              | N/A             | Haupt et. al (1997) [221]                                       |
| Langerhans cell histiocytosis                            | M   | 9                            | VBL, PSL, vindesine                                     | 102 <sup>a</sup> | t(15;17)                                                                                                             | N/A | BMT                                              | CR              | Kudo et. al (1998) [37]                                         |
| Langerhans cell histiocytosis                            | F   | 10.75                        | VP-16, MP, VBL                                          | 60               | t(15;17)                                                                                                             | M3  | Ara-C, idarubicin, ATRA, MTX, VP-16, thioguanine | CR, 3+ yrs      | Dufour et. al (2001) [219]                                      |
| Liver transplant (ornithine transcarbamylase deficiency) | F   | 13.75                        | Immunosuppressive therapy: tacrolimus, azathioprine     | 21               | 46,XX,t(15;17)(q22;q12), PML-RARA by PCR                                                                             | M3  | Ara-C, DNR, ATRA, MP, MTX                        | CR, 14+ months  | Sato et. al (2005) [231]                                        |
| Liver transplant (congenital biliary atresia)            | F   | 7                            | Immunosuppressive therapy: tacrolimus                   | 46               | 46,XX,t(15;17)(q22;q12)                                                                                              | M3  | Ara-C, DNR, ATRA, PSL                            | CR, 3 months    | Sato et. al (2005) [231]                                        |
| Multiple sclerosis                                       | F   | 21                           | MX                                                      | 52               | 46, XX,t(15;17)(q22;q12)                                                                                             | M3  | ATRA, idarubicin, HCST                           | CR              | Ledda et. al (2006) [223]                                       |
| Neuroblastoma                                            | F   | 5.8                          | VP-16, Carboplatin                                      | 3 <sup>b</sup>   | t(15;17)                                                                                                             | M3  | N/A                                              | Died            | Schiavetti et. al (2001) [232]                                  |
| Psoriasis                                                | M   | 17                           | Bimolane                                                | 36               | 46,XY/46,XY, Ip+, t(15;17) (q22;q12)                                                                                 | M3  | ATRA                                             | CR, 57+ months  | Xue et. al (1992) [233]                                         |
| Psoriasis                                                | F   | 21                           | Bimolane                                                | 24               | 46,XX/46, XX, t(15;17) (q22;q12)                                                                                     | M3  | ATRA                                             | CR, 21 months   | Xue et. al (1992) [233]                                         |
| Rhabdomyosarcoma                                         | M   | 8                            | Cy, IFM, CDDP, Act-D, anthracycline, VP-16, RT          | 45               | 44,XY, -5,-17,del(7)(q22;q35), dic(7;11;7;21)(?::11q22->11p15::?:21p13->21qter, +der(5)t(5;17)(q11;q11) <sup>c</sup> | M2  | N/A                                              | N/A             | Rubin et. al (1991) [230]                                       |
| Wilms' Tumor                                             | M   | 2                            | IFM, Act-D,VP-16, RT                                    | 21               | 46,XY,-8,dir dup(3)(p21->p25)t(5;17)(q31;p11),+der8,t(8;13)(p21;q12) <sup>d</sup>                                    | M2  | N/A                                              | N/A             | Rubin et. al (1991) [230]                                       |

  

| B) Therapy-Related APL Cases Diagnosed by Morphology |   |     |                                                                                                                                  |                 |                                                                          |     |                                                      |                |                                  |
|------------------------------------------------------|---|-----|----------------------------------------------------------------------------------------------------------------------------------|-----------------|--------------------------------------------------------------------------|-----|------------------------------------------------------|----------------|----------------------------------|
| Ewings sarcoma                                       | M | 10  | CDDP, VM 26, VP-16, VCR, Cy, Act-D, Dox, IFM                                                                                     | 32              | N/A, cytogenetic analysis was unsuccessful due to technical difficulties | M3  | ATRA                                                 | CR, 8+ months  | Lopez-Andrew et. al (1994) [226] |
| Hodgkin Lymphoma                                     | M | 7   | splenectomy, chemotherapy (alternating MOPP and ABVD for six cycles,) mantle field RT (2500 rad), inverted Y irradiation (25 Gy) | 4               | 46,XY,t(8;21)(q22;q22),t(9;22)(q34;q11) <sup>e</sup>                     | M3  | DNR + Ara-C; high-dose Ara-C; ablative therapy, ABMT | Died, 6 months | Dallorso et. al (1990) [218]     |
| Langerhans cell histiocytosis                        | F | 7   | VP-16, VBL, steroids                                                                                                             | 46.8            | 46,XX,del(2)(q11;q13) at relapse <sup>e</sup>                            | M3  | N/A                                                  | N/A            | Haupt et. al (1997) [221]        |
| Langerhans cell histiocytosis                        | F | 0.8 | VP-16                                                                                                                            | 30              | 46,XX,+ ring,-6,-10, +marker <sup>e</sup>                                | M3v | Ara-C, idarubicin, TBRT, melphalan, ABMT             | N/A            | Haupt et. al (1997) [221]        |
| Langerhans cell histiocytosis                        | F | 8   | VP-16, Cy, ADR, VBL, steroids                                                                                                    | 105.6           | N/A                                                                      | M3  | N/A                                                  | N/A            | Haupt et. al (1997) [221]        |
| Langerhans cell histiocytosis                        | M | 7   | VBL, PDN, VP-16                                                                                                                  | 18 <sup>f</sup> | 46, XY t(1;3)(p36;q21); del(17), del 18p, iso 16q <sup>e</sup>           | M3  | ATRA, thioguanine, Dox, Ara-C                        | N/A            | Lopes et. al (1999) [225]        |
| Langerhans cell histiocytosis                        | F | 11  | VP-16                                                                                                                            | 47              | 46, XX,del(20)(q11;q13) <sup>e</sup>                                     | M3  | Chemotherapy                                         | Died           | Ogami et. al (2004) [228]        |
| Malignant ependymoma                                 | M | 12  | RT                                                                                                                               | 20              | N/A                                                                      | M3  | N/A                                                  | Died           | Pai et. al (1985) [229]          |
| Multiple sclerosis                                   | F | 21  | MX                                                                                                                               | 18              | N/A                                                                      | N/A | N/A                                                  | CR             | Ellis and Bogglid (2009) [220]   |
| Psoriasis                                            | F | 19  | Bimolane                                                                                                                         | 21.6            | N/A                                                                      | M3  | N/A                                                  | N/A            | Li et. al (1989) [224]           |

<sup>a</sup> Latency defined as interval between primary disease and development of t-APL.

<sup>b</sup> Latency defined as time from interruption of treatment for primary disease to development of t-APL.

<sup>c</sup> karyotype for 55% of 20 metaphse cells examined. Karotype for remaining cells: 46 XY (15%), 45 XY,-5,-17, del(7),(q22q35),+der(5)t(5;17)(q11;q11) (10%); 46 XY,-5-7, +21, del(7)(q22q35), +der(5)t(5;17)(q11;q11) (10%)

<sup>d</sup> karyotype for 38% of 24 metaphase cells examined. Karotype for remaining cells: 46,XY,dir dup(3),(p21-> p25), t(5;17)(q31;p11) (29%); 46,XY,-2,dir dup(3),(p21-> p25),t(3;7)(q27;?), t(5;17)(q31;p11),t(21;7)(q11;?),+der(2),t(2;13)(q31;q12) (33%)

<sup>e</sup> cytogenetics inconsistent with APL

<sup>f</sup> treatment for LCH was irregular due to social-economic family problem. Time between treatment for LCH and APL was unclear.

ABMT, autologous bone marrow therapy; ABVD, adriamycin (doxorubicin), bleomycin, vinblastine, dacarbazine; Act-D, actinomycin D; ACVBP, doxorubicin, cyclophosphamide, vindesine, bleomycin, prednisone; Ara-C, cytosine arabinoside (cytarabine); AN, anthracyclines; ATRA, all trans retinoic acid; AVBD, adriamycin, bleomycin, vinblastine & dacarbazine; BI, bleomycin; CDDP, cisplatinum; CR, complete remission; Cy, Cyclophosphamide; D, dacarbazine; DNR, daunorubicin; Dox, Doxorubicin (adriamycin); HDMP, high dose methylprednisolone; IFM, iphoshamide; LCH, Langerhans Cell Histiocytosis; MOPP, mechlorethamine, vincristine, procarbazine, prednisone; MP, methylprednisolone; MTX, methotrexate; MX, mitoxantrone; N, nitrogen mustard; PDN, prednisone; P, procarbazine; PSL,prednisolone; RT, radiotherapy; TBRT, tumor bed radiotherapy; VBL, vinblastine; VCR, vincristine; VM-26, teniposide; VP-16, etoposide.
