# Supplementary material
Source: PubMed Central journal article supplement (PMC4379131)
Supplement: NIHMS635344-supplement-4.pdf [file NIHMS635344-supplement-4.pdf]

**Supplementary Table S3. Therapy-Related APL in Adults**

| Primary Disease (n)                                                                                                                                                                                                                                                                                                                                                                                                                                                                                                                                                                                                                                                                                                                                 | t-APL Cases (n) | Age Range (yrs) | Gender (M/F)     | Time to APL (mo) | Treatment for Primary Disease (n)                                                                                                                                                                                                                                                                                                                                                                                                                                                                                                                                                                                          | Reference                        |
|-----------------------------------------------------------------------------------------------------------------------------------------------------------------------------------------------------------------------------------------------------------------------------------------------------------------------------------------------------------------------------------------------------------------------------------------------------------------------------------------------------------------------------------------------------------------------------------------------------------------------------------------------------------------------------------------------------------------------------------------------------|-----------------|-----------------|------------------|------------------|----------------------------------------------------------------------------------------------------------------------------------------------------------------------------------------------------------------------------------------------------------------------------------------------------------------------------------------------------------------------------------------------------------------------------------------------------------------------------------------------------------------------------------------------------------------------------------------------------------------------------|----------------------------------|
| breast carcinoma (4), laryngeal carcinoma (1)                                                                                                                                                                                                                                                                                                                                                                                                                                                                                                                                                                                                                                                                                                       | 5               | N/A             | N/A              | N/A              | radiation (5), mitoxantrone (4), cyclophosphamide (4), vincristine (1), doxorubicin (1), tamoxifen (1), 5-FU fluorouracil (1)                                                                                                                                                                                                                                                                                                                                                                                                                                                                                              | Mistry et. al (2005) [40]        |
| colon cancer (1), breast cancer (2)                                                                                                                                                                                                                                                                                                                                                                                                                                                                                                                                                                                                                                                                                                                 | 3               | 41- 66          | 0/3              | N/A              | topoisomerase II inhibitors (1), alkylating agents (1), radiation (2)                                                                                                                                                                                                                                                                                                                                                                                                                                                                                                                                                      | Bhavnani et. al (1994) [234]     |
| breast carcinoma (6)                                                                                                                                                                                                                                                                                                                                                                                                                                                                                                                                                                                                                                                                                                                                | 6               | 40 - 66         | N/A              | 18 - 48          | epirubicin (6), cyclophosphamide (6), radiation (5), 5-FU fluorouracil (2), methotrexate (2)                                                                                                                                                                                                                                                                                                                                                                                                                                                                                                                               | Mays et. al (2010) [247]         |
| multiple sclerosis (13)                                                                                                                                                                                                                                                                                                                                                                                                                                                                                                                                                                                                                                                                                                                             | 13              | 21 - 61         | 6/6 <sup>a</sup> | 2 - 60           | mitoxantrone (13)                                                                                                                                                                                                                                                                                                                                                                                                                                                                                                                                                                                                          | Ellis and Bogglid (2009) [220]   |
| seminoma (1), breast cancer (1)                                                                                                                                                                                                                                                                                                                                                                                                                                                                                                                                                                                                                                                                                                                     | 2               | 22,69           | 1/1              | 31 30            | etoposide (1), cisplatin, (1) bleomycin (1), tamoxifen (1), epirubicin (1), cyclophosphamide (1), 5-FU-fluorouracil (1), methotrexate (1), radiation (1)                                                                                                                                                                                                                                                                                                                                                                                                                                                                   | Hoffman et. al (1995) [243]      |
| Hodgkin lymphoma (3)                                                                                                                                                                                                                                                                                                                                                                                                                                                                                                                                                                                                                                                                                                                                | 3               | 23 - 32         | 2/1              | 14 - 270         | radiation (3), mechloethamine (2), vincristine (2), procarbazine (2), prednisone (2), adriamycin (1), bleomycin (1), vinblastine (1), dacarbazine (1)                                                                                                                                                                                                                                                                                                                                                                                                                                                                      | Gillis et. al (1995) [241]       |
| prostate carcinoma (1)                                                                                                                                                                                                                                                                                                                                                                                                                                                                                                                                                                                                                                                                                                                              | 1               | 74              | 1/0              | N/A              | radiation (1)                                                                                                                                                                                                                                                                                                                                                                                                                                                                                                                                                                                                              | Chen et. al (1996) [235]         |
| chronic lymphocytic leukemia (1), prostate carcinoma (1)                                                                                                                                                                                                                                                                                                                                                                                                                                                                                                                                                                                                                                                                                            | 1               | 69              | 1/0              | N/A              | radiation (1), leuprolide (1)                                                                                                                                                                                                                                                                                                                                                                                                                                                                                                                                                                                              | Molero et. al (2001) [248]       |
| multiple sclerosis (1)                                                                                                                                                                                                                                                                                                                                                                                                                                                                                                                                                                                                                                                                                                                              | 1               | 36              | 1/0              | 60               | mitoxantrone (1)                                                                                                                                                                                                                                                                                                                                                                                                                                                                                                                                                                                                           | Ghalie et. al (2002) [240]       |
| prostate cancer (2), mixed germ cell tumor (1), breast cancer (5), follicular lymphoma (3), squamous cell carcinoma (2), malignant fibrous histiocytoma (1), diffuse large B-cell lymphoma (1), adeno-carcinoma (1), chronic lymphocytic leukemia (1)                                                                                                                                                                                                                                                                                                                                                                                                                                                                                               | 17              | 35 - 81         | 9/8              | 17 - 116         | radiation (14), interferon (2),cyclophosphamide (8), doxorubicin (7), vincristine (4), prednisone (4), ifosfamide (1), fluorouracil (4), methotrexate (2), tamoxifen (1), rituximab (2), fludarabine (2), 5-fluorouracil (1), anastrozole (1)                                                                                                                                                                                                                                                                                                                                                                              | Yin et. al (2005) [253]          |
| prostate cancer (2)                                                                                                                                                                                                                                                                                                                                                                                                                                                                                                                                                                                                                                                                                                                                 | 1               | 67              | 1/0              | 16               | brachytherapy (radiation) (1)                                                                                                                                                                                                                                                                                                                                                                                                                                                                                                                                                                                              | Sinha et. al (2006) [252]        |
| multiple sclerosis (2)                                                                                                                                                                                                                                                                                                                                                                                                                                                                                                                                                                                                                                                                                                                              | 2               | 51, 48          | 1/1              | 22,2             | mitoxantrone (2)                                                                                                                                                                                                                                                                                                                                                                                                                                                                                                                                                                                                           | Ramkumar et. al (2008) [251]     |
| multiple sclerosis (5)                                                                                                                                                                                                                                                                                                                                                                                                                                                                                                                                                                                                                                                                                                                              | 5               | 23 - 59         | 2/3              | 1 - 45           | mitoxantrone (5), interferon beta (3), azathioprine (1)                                                                                                                                                                                                                                                                                                                                                                                                                                                                                                                                                                    | Pascual et. al (2009) [250]      |
| ovarian carcinoma (1), choriocarcinoma (1), neuroectodermal tumor (1)                                                                                                                                                                                                                                                                                                                                                                                                                                                                                                                                                                                                                                                                               | 3               | 33 - 48         | 1/2              | 20 - 42          | cisplatin (1), bleomycin (1), etoposide (3) methotrexate (1), actinomycin-D (1), vincristine (1), cyclophosphamide (1), carboplatin (1)                                                                                                                                                                                                                                                                                                                                                                                                                                                                                    | Malhotra et. al (2010) [245]     |
| testicular cancer (2), non-Hodgkin lymphoma (4), prostate cancer (5), cervical cancer (2), head and neck squamous cell carcinoma (2), breast cancer (8), arthritis (1), stomach cancer, small lymphocytic lymphoma (1), myelodysplastic syndrome/acute myeloid leukemia (1), seminoma (1), multiple sclerosis (1), malignant fibrous histiocytoma <sup>b</sup>                                                                                                                                                                                                                                                                                                                                                                                      | 29              | 35 - 81         | 15/14            | 1 - 19           | adriamycin (6), bleomycin (2), cisplatin (4), cyclophosphamide (8), doxorubicin (4), vincristine (4), prednisone (4), mitoxantrone (6), etoposide (2), methylprednisone (1), high-dose cytarabine (1), paclitaxel (4), capecitabine (1), rituximab (2), 5-fluorouracil (2), fludarabine (1), cytarabine (1), idarubicin (1), epirubicin (1), docetaxel (1), ifosfamide (1), radiation (23)                                                                                                                                                                                                                                 | Dayyani et. al (2011) [237]      |
| testicular cancer (1), prostate cancer (1), breast cancer (3), pancreatic cancer (1), cardiac transplant (1), membranous glomerulonephropathy (1), myelodysplastic syndrome (1)                                                                                                                                                                                                                                                                                                                                                                                                                                                                                                                                                                     | 9               | 29 - 69         | 4/5              | 14 - 132         | radiation (5), alkylating agent (1), topoisomerase II inhibitor (2), unspecified chemotherapy (1), antimetabolite chemotherapy (1), immunosuppression (2)                                                                                                                                                                                                                                                                                                                                                                                                                                                                  | Duffield et. al (2012) [238]     |
| lung carcinoma (2), prostate carcinoma (2), breast carcinoma (2), endometrium carcinoma (1), non-Hodgkin lymphoma (1), rheumatoid arthritis (2), Crohn's disease (1)                                                                                                                                                                                                                                                                                                                                                                                                                                                                                                                                                                                | 11              | 18 - 76         | 6/5              | N/A              | etoposide (2), carboplatin (2), radiation (6), adriamycin (3), cyclophosphamide (3), paclitaxel (1), herceptin (1), bleomycin (1), vinblastine (1), vincristine (1), procarbazine (1), prednisone (1), azathioprine (2), mitoxantrone (3), TNF-alpha inhibitor (2), 6-mercaptopurine (1)                                                                                                                                                                                                                                                                                                                                   | Elliot et. al (2012) [239]       |
| non-Hodgkin lymphoma (1), multiple sclerosis (8), Lewis-Sumner syndrome (1), corpus uteri carcinoma (1), Hodgkin lymphoma (1), prostate cancer (2), histiocytoma (1), breast cancer (1)                                                                                                                                                                                                                                                                                                                                                                                                                                                                                                                                                             | 16              | 29 - 79         | 7/9              | N/A              | rituximab (1), cyclophosphamide (1), hydroxydaunorubicin (1), oncovin (1), prednisone (1), mitoxantrone (8), azathioprine (1), radiation (6), adriamycin (1), bleomycin (1), vinblastine (1), dacarbazine (1), hormone therapy (1)                                                                                                                                                                                                                                                                                                                                                                                         | Ottone et. al (2012) [216]       |
| N/A                                                                                                                                                                                                                                                                                                                                                                                                                                                                                                                                                                                                                                                                                                                                                 | 1               | 50              | 0/1              | N/A              | mitoxantrone (1), cyclophosphamide (1), fluorouracil (1), radiation (1)                                                                                                                                                                                                                                                                                                                                                                                                                                                                                                                                                    | Linassier et. al (2000) [244]    |
| gestational trophoblastic disease (1), mantle cell lymphoma (1)                                                                                                                                                                                                                                                                                                                                                                                                                                                                                                                                                                                                                                                                                     | 2               | 27,74           | 1/1              | 12,24            | methotrexate (1), bleomycin (1), etoposide (1), cyclophosphamide (1), vincristine (1), procarbazine (1), prednisolone (1)                                                                                                                                                                                                                                                                                                                                                                                                                                                                                                  | Au et. al (2002) [38]            |
| breast carcinoma (60), non-Hodgkin lymphoma (5), Hodgkin lymphoma (2), primary CNS non-Hodgkin lymphoma (1), diffuse large B cell non-Hodgkin lymphoma (4), mucosa-associated lymphoid tissue non-Hodgkin lymphoma (1), follicular non-Hodgkin lymphoma (2), T-cell non-Hodgkin lymphoma (1), multiple myeloma (1), acute myeloid leukemia (1), hydatiform mole (1), ovarian carcinoma (2), lung epidermoid carcinoma (1), colonic carcinoma (5), neuroepithelioma (1), prostate carcinoma (5), bladder carcinoma (2), primary location unknown carcinoma (1), thyroid carcinoma (3), tongue carcinoma (1), ovarian/endometrial carcinoma (1), astrocytoma (1), larynx carcinoma (1), multiple sclerosis (1), polyradiculoneuritis (1) <sup>c</sup> | 104             | 23 - 82         | 28/76            | 4 - 276          | radiation (76), cyclophosphamide (52), ifosfamide (9), thiotepa (2), cisplatin (4), carboplatin (2), oxaliplatin (1), chlormethine (1), lomustin (1), chlorambucil (3), mitomycin (5), melphalan (4), busulfan (2), procarbazine (3), dacarbazine (1), prednimustine (2), etoposide (17), teniposide (2), doxorubicin (15), epirubicin (14), daunorubicin (1), mitoxantrone (28), metabolite (58), methotrexate (18), fluorouracil (43), cytarabine (7), fludarabine (1), thioguanine (1), vincristine (17), vinblastine (1), vindesine (7)), vinorelbine (3), bleomycin (8), taxanes (1), ellipticine (1), irinotecan (1) | Beaumont et. al (2003) [208]     |
| multiple sclerosis (13)                                                                                                                                                                                                                                                                                                                                                                                                                                                                                                                                                                                                                                                                                                                             | 13              | 24 - 59         | 6/7              | 13 - 237         | mitoxantrone (11), prednisone (1), IFN-beta (1)                                                                                                                                                                                                                                                                                                                                                                                                                                                                                                                                                                            | Hasan et. al (2008) [242]        |
| breast cancer (1)                                                                                                                                                                                                                                                                                                                                                                                                                                                                                                                                                                                                                                                                                                                                   | 1               | 36              | 0/1              | N/A              | radiation (1), hormone therapy (1), tamoxifen (1), medroxyprogesterone acetate (1),                                                                                                                                                                                                                                                                                                                                                                                                                                                                                                                                        | Ono et. al (2008) [249]          |
| breast cancer (1), corpus uteri carcinoma (1), multiple sclerosis (6)                                                                                                                                                                                                                                                                                                                                                                                                                                                                                                                                                                                                                                                                               | 8               | 27 - 65         | 3/5              | 14 - 180         | radiation (2), tamoxifen (1), mitoxantrone (6), interferon (2), steroids (1)                                                                                                                                                                                                                                                                                                                                                                                                                                                                                                                                               | Hasan et. al (2010) [214]        |
| multiple sclerosis (1)                                                                                                                                                                                                                                                                                                                                                                                                                                                                                                                                                                                                                                                                                                                              | 1               | 43              | 1/0              | 9                | methylprednisolone (1), mitoxantrone (1),                                                                                                                                                                                                                                                                                                                                                                                                                                                                                                                                                                                  | Colovic et. al (2012) [236]      |
| chronic lymphocytic leukemia (1), testicular teratoma (1)                                                                                                                                                                                                                                                                                                                                                                                                                                                                                                                                                                                                                                                                                           | 2               | 46,28           | 1/1              | 25,60            | bleomycin (1), etoposide (1), cisplatin (1)                                                                                                                                                                                                                                                                                                                                                                                                                                                                                                                                                                                | Martin and Majumdar (2002) [246] |

<sup>a</sup> information about gender missing for one patient

<sup>b</sup> one patient had both breast cancer and arthritis; one patient had both myelodysplastic syndrome and breast cancer

<sup>c</sup> one patient had both prostate and bladder carcinoma
